# Supplementary material
Source: MDPI journal article supplement (https://www.mdpi.com/1424-2818/13/3/136)
Supplement: s1 [file s1]

**Table S2.** Number of species in different arthropod families reported associated with *Eciton burchellii* according to Rettenmeyer et al. (2011).

| Taxa        | Family            | Species count |
|-------------|-------------------|---------------|
| Lepidoptera | Hesperiidae       | 322           |
|             | Nymphalidae       | 5             |
|             | Papilionidae      | 1             |
| Hymenoptera | Bethylidae        | 2             |
|             | Cynipidae         | 3             |
|             | Diapriidae        | 30            |
|             | Scelionidae       | 2             |
| Diptera     | Conopidae         | 15            |
|             | Muscoidea         | 2             |
|             | Sarcophagidae     | 28            |
|             | Tachinidae        | 13            |
|             | Phoridae          | 85            |
| Acari       | Acaridae          | 2             |
|             | Ascidae           | 1             |
|             | Circocyllibanidae | 6             |
|             | Histiostomatidae  | 2             |
|             | Laelaptiade       | 1             |
|             | Larvamimidae      | 2             |
|             | Macrochelidae     | 1             |
|             | Pinoglyphidae     | 1             |
|             | Pygmephoridae     | 6             |
|             | Scutacaridae      | 14            |
|             | Trachyuropodidae  | 5             |
| Collembola  | Cyphoderidae      | 1             |
|             | Entomobryidae     | 5             |
|             | Isotomidae        | 3             |
|             | Hypogastruridae   | 1             |
| Zygentoma   | Nicoletiidae      | 2             |
| Diplopoda   | Stylodesmidae     | 1             |
| Coleoptera  | Histeridae        | 20            |
|             | Ptilidae          | 2             |
|             | Staphylinidae     | 37            |
