# Supplementary material
Source: MDPI journal article supplement (https://www.mdpi.com/1424-2818/13/3/136)
Supplement: s1 [file s1]

**Table S1.** Antbird species reported to attend *Eciton* army ant raids. Most of the reports refer to *Eciton burchellii*, <sup>p</sup> indicates species that have also been reported attending raid of *E. b. parvispinum*, <sup>r</sup> *Eciton rapax* and <sup>m</sup> *E. mexicanum*. The degree of specialization of antbirds is indicated as Ob (Obligate), R (Regular), and Oc (Occasional). For antbird species for which the behaviour of bivouac checking has been observed this is indicated as <sup>b</sup>.

| Antbird                                       | Common name                 | Specialization | References   |
|-----------------------------------------------|-----------------------------|----------------|--------------|
| <b>Cuculidae</b>                              |                             |                |              |
| <i>Crotophaga sulcirostris</i>                | Groove-billed Ani           | Oc/R           | [1]          |
| <i>Neomorphus geoffroyi</i>                   | Rufous-vented Ground Cuckoo | Oc             | [2–4]        |
| <i>Piaya cayana</i>                           | Squirrel Cuckoo             | Oc/R           | [1,5–7]      |
| <b>Formicariidae</b>                          |                             |                |              |
| <i>Formicarius analis</i>                     | Black-faced Antthrush       | R <sup>b</sup> | [2,8,9]      |
| <i>Formicarius colma</i>                      | Rufous-capped Antthrush     | Oc             | [10,11]      |
| <i>Formicarius nigricapillus</i> <sup>p</sup> | Black-headed Antthrush      | Oc             | [7]          |
| <i>Formicarius rufipectus</i> <sup>p</sup>    | Rufous-breasted Antthrush   | Oc             | [6,7]        |
| <i>Phlegopsis borbae</i>                      | Pale-faced Antbird          | Ob             | [12]         |
| <i>Phlegopsis erythroptera</i>                | Reddish-winged Bare-Eye     | Ob             | [2,4,13,14]  |
| <i>Phlegopsis nigromaculata</i>               | Black-spotted Bare-Eye      | Ob             | [2,13,15–18] |
| <i>Pyriglena leuconata</i>                    | White-backed Fire-eye       | Ob             | [15]         |
| <i>Pyriglena leucoptera</i>                   | White-shouldered Fire-eye   | Oc             | [11]         |

**Furnariidae**

|                                               |                              |                 |                   |
|-----------------------------------------------|------------------------------|-----------------|-------------------|
| <i>Automolus achrolaemus</i> <sup>p</sup>     | Buff-thoated Foliage Gleaner | Oc              | [7]               |
| <i>Cranioleuca erythrops</i> <sup>p</sup>     | Red-faced Spinetail          | Oc              | [7]               |
| <i>Deconychura longicauda</i>                 | Long-tailed Woodcreeper      | Oc              | [5,7]             |
| <i>Dendrocincla anabatina</i>                 | Tawny-winged Woodcreeper     | Ob <sup>b</sup> | [5,9]             |
| <i>Dendrocolaptes certhia</i>                 | Amazonian Barred Woodcreeper | Ob              | [2,6,15]          |
| <i>Dendrocincla fuliginosa</i>                | Plain-brown Woodcreeper      | R <sup>b</sup>  | [2,10,15,19–21]   |
| <i>Dendrocincla homochroa</i>                 | Ruddy Woodcreeper            | Oc <sup>b</sup> | [7,22]            |
| <i>Dendrocincla homochroa</i>                 | Ruddy Woodcreeper            | Oc              | [6]               |
| <i>Dendrocincla merula</i>                    | White-chinned Woodcreeper    | Ob              | [2,3,10,15,16,18] |
| <i>Dendrocincla turdina</i>                   | Plain-winged Woodcreeper     | Oc              | [11,23]           |
| <i>Dendrocolaptes hoffmannsi</i>              | Hoffmann's Woodcreeper       | R               | [13,24]           |
| <i>Dendrocolaptes platyrostris</i>            | Planalto Woodcreeper         | Oc              | [11]              |
| <i>Dendrocolaptes picumnus</i>                | Black-banded Woodcreeper     | Ob              | [2,10]            |
| <i>Dendrocolaptes sanctithomae</i>            | Northern Barred Woodcreeper  | Oc <sup>b</sup> | [3,5,7,9,21]      |
| <i>Glyphorynchus spirurus</i>                 | Wedge-billed Woodcreeper     | Oc              | [2,5,7]           |
| <i>Hylexetastes perrotii</i>                  | Red-billed Woodcreeper       | Ob              | [2]               |
| <i>Lepidocolaptes affinis</i> <sup>p</sup>    | Spot-crowned Woodcreeper     | Oc              | [6,7]             |
| <i>Lepidocolaptes souleyetii</i> <sup>p</sup> | Streak-headed Woodcreeper    | Oc              | [7]               |
| <i>Margarornis rubiginosus</i> <sup>p</sup>   | Ruddy Treerunner             | Oc              | [7]               |
| <i>Premnoplex brunnescens</i> <sup>p</sup>    | Spotted Barbtail             | Oc              | [7]               |
| <i>Sclerurus mexicanus</i> <sup>p</sup>       | Tawny-throated Leaf Tosser   | Oc              | [7]               |

**Furnariidae** (continuation)

|                                                 |                            |                |          |
|-------------------------------------------------|----------------------------|----------------|----------|
| <i>Sittasomus griseicapillus</i> <sup>p</sup>   | Olivaceous Woodcreeper     | Oc             | [6,7,11] |
| <i>Synallaxis ruficapilla</i>                   | Rufous-capped Spinetail    | Oc             | [11]     |
| <i>Thripadectes rufobrunneus</i> <sup>p</sup>   | Streak-breasted Treehunter | Oc             | [7]      |
| <i>Xiphocolaptes albicollis</i>                 | White-throated Woodcreeper | Oc             | [11]     |
| <i>Xiphorhynchus erythropygius</i> <sup>p</sup> | Spotted Woodcreeper        | Oc             | [7]      |
| <i>Xiphorhynchus fuscus</i>                     | Lesser Woodcreeper         | Oc             | [11]     |
| <i>Xiphorhynchus guttatus</i>                   | Buff-thoated Woodcreeper   | R              | [2,5]    |
| <i>Xiphorhynchus lachrymosus</i>                | Black-stripped Woodcreeper | Oc             | [3]      |
| <i>Xiphorhynchus susurrans</i>                  | Cocoa Woodcreeper          | R <sup>b</sup> | [5,9]    |

**Thamnophilidae**

|                                                 |                         |                 |                      |
|-------------------------------------------------|-------------------------|-----------------|----------------------|
| <i>Batara cinerea</i>                           | Giant Antshrike         | Oc              | [11]                 |
| <i>Cercomacra tyrannina</i>                     | Dusky Antbird           | Oc              | [8,13]               |
| <i>Cymbilaimus lineatus</i>                     | Fasciated Antshrike     | Oc              | [8]                  |
| <i>Dysithamnus mentalis</i> <sup>p</sup>        | Plain Antvireo          | Oc              | [7,8]                |
| <i>Dysithamnus striaticeps</i>                  | Streak-crowned Antvireo | Oc              | [8,11]               |
| <i>Gymnocichla nudiceps</i>                     | Bare-crowned Antbird    | R               | [1,8,13]             |
| <i>Gymnopathys leucaspis</i> /G. <i>bicolor</i> | Bicolored Antbird       | Ob <sup>b</sup> | [1,3–5,7–9,13,21,22] |
| <i>Gymnopathys lunulatus</i>                    | Lunulated Antbird       | Ob              | [5,13]               |
| <i>Gymnopathys rufigula</i>                     | Rufous-throated Antbird | Ob              | [1,10,13,25]         |
| <i>Gymnopathys salvini</i>                      | White-throated Antbird  | Ob              | [13,16,18]           |

**Thamnophilidae** (continuation)

|                                               |                                |                |                          |
|-----------------------------------------------|--------------------------------|----------------|--------------------------|
| <i>Hafferia fortis</i>                        | Sooty Antbird                  | Ob             | [4,13]                   |
| <i>Hylophylax naevioides</i> <sup>m</sup>     | Spotted Antbird                | R/Ob           | [1,3,7,8,13,20,22,26,27] |
| <i>Hylophylax poecilonota</i>                 | Scale-backed Antbird           | R/Oc           | [1,2,10,13,15]           |
| <i>Hypocnemis cantator</i>                    | Warbling Antbird               | Oc             | [2,13]                   |
| <i>Mackenziana severa</i>                     | Tufted Antshrike               | Oc             | [11]                     |
| <i>Microrhophias quixensis</i>                | Dot-winged Antwren             | Oc             | [8]                      |
| <i>Myrmeciza exsul</i> <sup>p</sup>           | Chestnut-backed Antbird        | Oc             | [7,9]                    |
| <i>Myrmeciza fortis</i>                       | Sooty Antbird                  | R/Ob           | [1,18]                   |
| <i>Myrmeciza immaculata</i>                   | Immaculate Antbird             | R              | [1,6,8,13,22]            |
| <i>Myrmeciza laemosticta</i>                  | Dull-mantled Antbird           | Oc             | [7,22]                   |
| <i>Myrmeciza zeledoni</i> <sup>p</sup>        | Zeledon's Antbird              | R <sup>b</sup> | [7]                      |
| <i>Myrmoborus leucophrys</i>                  | White-browed Antbird           | R              | [2]                      |
| <i>Myrmornis torquata</i>                     | Wing-banded Antbird            | Oc             | [8]                      |
| <i>Myrmotherula axillaris</i>                 | White-flanked Antwren          | Oc             | [8,28]                   |
| <i>Myrmotherula guttata</i>                   | Rufous-bellied Antwren         | Oc             | [28]                     |
| <i>Myrmotherula fulviventris</i>              | Checker-throated Stipplethroat | Oc             | [8,28]                   |
| <i>Myrmotherula gularis</i>                   | Star-throated Antwren          | Oc             | [11,28]                  |
| <i>Myrmotherula hauxwelli</i> <sup>p, r</sup> | Plain-throated Antwren         | Oc             | [28]                     |
| <i>Myrmotherula schisticolor</i>              | Slaty Antwren                  | Oc             | [5,7,28]                 |
| <i>Percnostola rufifrons</i>                  | Black-headed Antbird           | R              | [1,2,10]                 |
| <i>Phaenostictus mcleannani</i>               | Ocellated Antbird              | Ob             | [1,3,7,8,13,21,22,29–31] |

**Thamnophilidae** (continuation)

|                                            |                          |      |                 |
|--------------------------------------------|--------------------------|------|-----------------|
| <i>Pithys albifrons</i>                    | White-plumed Antbird     | Ob   | [2,4,10,13]     |
| <i>Pithys castaneus</i>                    | White-masked Antbird     | Ob   | [13]            |
| <i>Rhegmatorhina berlepschi</i>            | Harlequin Antbird        | R/Oc | [32]            |
| <i>Rhegmatorhina cristata</i>              | Chestnut-crested Antbird | R    | [32]            |
| <i>Rhegmatorhina gymnops</i>               | Bare-eyed Antbird        | Ob   | [13,17,32]      |
| <i>Rhegmatorhina hoffmannsi</i>            | White-breasted Antbird   | R/Ob | [13,32]         |
| <i>Rhegmatorhina melanosticta</i>          | Hairy-crested Antbird    | Ob   | [4,12,13,16,32] |
| <i>Skutchia borbae</i>                     | Pale-faced Antbird       | R    | [1]             |
| <i>Taraba major</i>                        | Great Antshrike          | Oc   | [5,8]           |
| <i>Thamnistes anabatinus</i>               | Russet Antshrike         | Oc   | [8]             |
| <i>Thamnomanes caecius</i>                 | Cinereous Antshrike      | Ob   | [17]            |
| <i>Thamnomanes saturninus</i>              | Saturnine Antshrike      | Oc   | [17]            |
| <i>Thamnophilus atrinucha</i> <sup>p</sup> | Black-crowned Antshrike  | Oc   | [7]             |
| <i>Thamnophilus bridgesi</i>               | Black-hooded Antshrike   | Oc   | [5,9]           |
| <i>Thamnophilus doliatus</i>               | Barred Antshrike         | Oc   | [8]             |

**Thraupidae**

|                                   |                           |                 |               |
|-----------------------------------|---------------------------|-----------------|---------------|
| <i>Chlorospingus ophthalmicus</i> | Common Bush-Tanager       | Oc              | [6]           |
| <i>Eucometis penicillata</i>      | Gray-headed Tanager       | Ob <sup>b</sup> | [5,7,9,15,33] |
| <i>Habia atrimaxillaris</i>       | Black-cheeked Ant-Tanager | Ob <sup>b</sup> | [1,5,9]       |
| <i>Habia fuscicauda</i>           | Red-throated Ant-Tanager  | R               | [1]           |

**Thraupidae** (continuation)

|                          |                               |    |       |
|--------------------------|-------------------------------|----|-------|
| <i>Habia gutturalis</i>  | Sooty Ant-Tanager             | R  | [1]   |
| <i>Lanio leucothorax</i> | White-throated Shrike-Tanager | Oc | [5,9] |
| <i>Pipra coronata</i>    | Blue-crowned Manakin          | Oc | [5,9] |
| <i>Pipra mentalis</i>    | Red-capped Manakin            | Oc | [5,9] |

**Pipridae**

|                                   |                          |    |      |
|-----------------------------------|--------------------------|----|------|
| <i>Pseudopipra pipra</i>          | White-crowned Manakin    | Oc | [2]  |
| <i>Ramphocelus melanurus</i>      | Long-billed Gnatwren     | Oc | [7]  |
| <i>Ramphocelus sanguinolentus</i> | Crimson-collared Tanager | Oc | [7]  |
| <i>Trichothraupis melanops</i>    | Black-glogged Tanager    | Oc | [11] |

**Tyrannidae**

|                                            |                          |    |       |
|--------------------------------------------|--------------------------|----|-------|
| <i>Attila spadiceus</i>                    | Bright-rumped Attila     | R  | [2,5] |
| <i>Corapipo altera</i>                     | White-ruffed Manakin     | R  | [2]   |
| <i>Lathrotriccus euleri</i>                | Euler's Flycatcher       | Oc | [11]  |
| <i>Myarchus tuberculifer</i> <sup>p</sup>  | Dusky-capped Flycatcher  | Oc | [7]   |
| <i>Platyrinchus coronatus</i> <sup>p</sup> | Golden-crowned Spadebill | Oc | [5,7] |
| <i>Platyrinchus mystaceus</i> <sup>p</sup> | White-throated Spadebill | Oc | [6,7] |
| <i>Rhynchocyclus brevirostris</i>          | Eye-ringed Flatbill      | Oc | [5]   |

**Turdidae**

|                                      |                                  |                 |          |
|--------------------------------------|----------------------------------|-----------------|----------|
| <i>Catharus aurantiirostris</i>      | Orange-billed Nightingale Thrush | Oc <sup>b</sup> | [6,7,22] |
| <i>Catharus frantzii</i>             | Ruddy-capped Nightingale Thrush  | Oc              | [6,7]    |
| <i>Catharus fuscater</i>             | Slaty-backed Nightingale Thrush  | Oc <sup>b</sup> | [6,7,22] |
| <i>Catharus gracilirostris</i>       | Black-billed Nightingale Thrush  | Oc              | [6]      |
| <i>Catharus mexicanus</i>            | Black-headed Nightingale Thrush  | Oc              | [7]      |
| <i>Catharus ustulatus</i>            | Swainson's Thrush                | Oc              | [7]      |
| <i>Hylocichla mustelina</i>          | Wood Thrush                      | Oc              | [5–7,22] |
| <i>Myadestes melanops</i>            | Black-faced Solitaire            | Oc              | [7]      |
| <i>Turdus albicollis</i>             | White-necked Thrush              | R               | [2]      |
| <i>Turdus assimilis</i> <sup>p</sup> | White-throated Thrush            | Oc              | [6,7]    |
| <i>Turdus grayi</i> <sup>p</sup>     | Clay-coloured Thrush             | Oc              | [6,7]    |

**Locustellidae**

|                               |               |    |     |
|-------------------------------|---------------|----|-----|
| <i>Locustella fluviatilis</i> | River Warbler | Oc | [2] |
|-------------------------------|---------------|----|-----|

**Conopophagidae**

|                             |                             |    |      |
|-----------------------------|-----------------------------|----|------|
| <i>Conopophaga aurita</i>   | Chestnut-belted Gnatcatcher | Oc | [2]  |
| <i>Conopophaga lineata</i>  | Rufous Gnatcatcher          | Oc | [11] |
| <i>Conopophaga melanops</i> | Black-cheeked Gnatcatcher   | Oc | [11] |

**Psophiidae**

|                          |                       |    |       |
|--------------------------|-----------------------|----|-------|
| <i>Psophia crepitans</i> | Gray-winged Trumpeter | Oc | [2,4] |
|--------------------------|-----------------------|----|-------|

**Bucconidae**

|                               |                         |    |       |
|-------------------------------|-------------------------|----|-------|
| <i>Monasa atra</i>            | Black Nunbird           | Oc | [2]   |
| <i>Malacoptila panamensis</i> | White-wiskered Puffbird | Oc | [5,9] |

**Emberizidae**

|                                                             |                             |                 |          |
|-------------------------------------------------------------|-----------------------------|-----------------|----------|
| <i>Atlapetes brunneinucha</i>                               | Chestnut-capped Brush-Finch | Oc              | [6]      |
| <i>Atlapetes gutturalis</i> / <i>albinucha</i> <sup>p</sup> | Yellow-throated Brush Finch | Oc              | [6,7]    |
| <i>Melozone leucotis</i> <sup>p</sup>                       | White-eared Ground Sparrow  | Oc <sup>b</sup> | [6,7,22] |
| <i>Tiaris olivacea</i>                                      | Yellow-faced Grassquit      | Oc              | [6]      |

**Momotidae**

|                                         |                      |                 |          |
|-----------------------------------------|----------------------|-----------------|----------|
| <i>Momotus coeruliceps</i> <sup>p</sup> | Blue-diademed Motmot | Oc <sup>b</sup> | [7]      |
| <i>Momotus momota</i>                   | Blue-crowned Motmot  | Oc              | [5,6,22] |

**Troglodytidae**

|                                               |                          |    |       |
|-----------------------------------------------|--------------------------|----|-------|
| <i>Cantorchilus modestus</i> <sup>p</sup>     | Cabani's Wren            | Oc | [7]   |
| <i>Cantorchilus thoracicus</i> <sup>p</sup>   | Stripe-breasted Wren     | Oc | [7]   |
| <i>Cyphorhinus phaeocephalus</i> <sup>p</sup> | Song Wren                | Oc | [7]   |
| <i>Henicorhina leucophrys</i> <sup>p</sup>    | Grey-breasted Wood Wren  | Oc | [6,7] |
| <i>Henicorhina leucosticta</i> <sup>p</sup>   | White-breasted Wood Wren | Oc | [6,7] |
| <i>Microcerculus luscini</i>                  | Whistling Wren           | Oc | [5]   |



**Troglodytidae** (continuation)

|                                                          |                       |                 |          |
|----------------------------------------------------------|-----------------------|-----------------|----------|
| <i>Thryothorus modestus</i>                              | Plain Wren            | Oc              | [6]      |
| <i>Thryothorus rufalbus</i> <sup>p</sup>                 | Rufous-and-white Wren | Oc <sup>b</sup> | [6,7,22] |
| <i>Thryothorus semibadius</i>                            | Riverside Wren        | Oc              | [5,9]    |
| <i>Thryothorus/Pheugopedius atrogularis</i> <sup>p</sup> | Black-throated Wren   | Oc              | [6,7]    |
| <i>Troglodytes aedon</i> <sup>p</sup>                    | House Wren            | Oc              | [7]      |
| <i>Troglodytes ochraceus</i> <sup>p</sup>                | Ochraceous Wren       | Oc              | [7]      |

**Corvidae**

|                                         |                 |                 |          |
|-----------------------------------------|-----------------|-----------------|----------|
| <i>Cyanocorax morio</i>                 | Brown Jay       | Oc              | [6,22]   |
| <i>Cyanolyca cucullata</i> <sup>p</sup> | Azure-hoode Jay | Oc              | [6,7,22] |
| <i>Psilorhinus morio</i> <sup>p</sup>   | Brown Jay       | Oc <sup>b</sup> | [7]      |

**Parulidae**

|                                              |                              |                 |             |
|----------------------------------------------|------------------------------|-----------------|-------------|
| <i>Basileuterus culicivorus</i> <sup>p</sup> | Golden-crowned Warbler       | Oc <sup>b</sup> | [6,7,22]    |
| <i>Basileuterus rivularis</i>                | Riverbank Warbler            | Oc              | [11]        |
| <i>Basileuterus rufifrons</i> <sup>p</sup>   | Rufous-capped Warbler        | Oc <sup>b</sup> | [6,7,13,22] |
| <i>Basileuterus tristriatus</i>              | Three-striped Warbler        | Oc              | [6,7,22]    |
| <i>Cardellina canadensis</i> <sup>p</sup>    | Canada Warbler               | Oc              | [7]         |
| <i>Dendroica virens</i> <sup>p</sup>         | Black-throated Green Warbler | Oc              | [6,22]      |
| <i>Geothlypis formosa</i> <sup>p</sup>       | Kentucky Warbler             | Oc              | [7]         |
| <i>Mniotilta varia</i>                       | Black-and-white Warbler      | Oc              | [6,7,22]    |

**Parulidae** (continuation)

|                                                 |                              |    |          |
|-------------------------------------------------|------------------------------|----|----------|
| <i>Myioborus miniatus</i>                       | Slate-throated Redstart      | Oc | [6,7,22] |
| <i>Oporornis formosus</i>                       | Kentucky Warbler             | Oc | [5,6,22] |
| <i>Phaeothlypsis/Myiothlypis fulvicauda</i>     | Buff-rumped Warbler          | Oc | [5,7]    |
| <i>Seiurus aurocapilla</i> <sup>p</sup>         | Ovenbird                     | Oc | [7,22]   |
| <i>Setophaga / Dendroica pensylvanica</i>       | Chesnut-sided Warbler        | Oc | [7,22]   |
| <i>Setophaga virens</i> <sup>p</sup>            | Black-throated Green Warbler | Oc | [7]      |
| <i>Vermivora chrysoptera</i> <sup>p</sup>       | Golden-winged Warbler        | Oc | [7,22]   |
| <i>Wilsonia canadensis</i> <sup>p</sup>         | Canada Warbler               | Oc | [6,22]   |
| <i>Wilsonia/Cardellina pusilla</i> <sup>p</sup> | Wilson's Warbler             | Oc | [6,7,22] |

**Ramphastidae**

|                                                    |                        |                 |     |
|----------------------------------------------------|------------------------|-----------------|-----|
| <i>Aulacorhynchus caeruleogularis</i> <sup>p</sup> | Blue-throated Toucanet | Oc <sup>b</sup> | [7] |
| <i>Aulacorhynchus prasinus</i>                     | Emerald Toucanet       | Oc              | [6] |

**Tyranidae**

|                                             |                      |    |       |
|---------------------------------------------|----------------------|----|-------|
| <i>Empidonax flavescens</i> <sup>p</sup>    | Yellowish Flycatcher | Oc | [6,7] |
| <i>Mitrephanes phaeocercus</i> <sup>p</sup> | Tufted Flycatcher    | Oc | [6,7] |

**Falconidae**

|                                          |                      |      |         |
|------------------------------------------|----------------------|------|---------|
| <i>Micrastur gilvicollis</i>             | Lined Forest-Falcon  | Oc   | [1]     |
| <i>Micrastur ruficollis</i> <sup>p</sup> | Barred Forest-Falcon | Oc/R | [1,6,7] |

**Falconidae** (continuation)

|                                             |                        |    |        |
|---------------------------------------------|------------------------|----|--------|
| <i>Micrastur semitorquatus</i> <sup>p</sup> | Collared Forest-Falcon | Oc | [5,34] |
|---------------------------------------------|------------------------|----|--------|

**Columbidae**

|                            |                  |    |     |
|----------------------------|------------------|----|-----|
| <i>Columbina talpacoti</i> | Ruddy Quail-Dove | Oc | [5] |
|----------------------------|------------------|----|-----|

|                               |                     |    |     |
|-------------------------------|---------------------|----|-----|
| <i>Geotrygon chiriquensis</i> | Chiriqui Quail-Dove | Oc | [6] |
|-------------------------------|---------------------|----|-----|

**Passerellidae**

|                               |                       |    |       |
|-------------------------------|-----------------------|----|-------|
| <i>Arremon aurantirostris</i> | Orange-billed Sparrow | Oc | [5,9] |
|-------------------------------|-----------------------|----|-------|

|                                          |                             |                 |     |
|------------------------------------------|-----------------------------|-----------------|-----|
| <i>Arremon brunneinucha</i> <sup>p</sup> | Chestnut-capped Brush Finch | Oc <sup>b</sup> | [7] |
|------------------------------------------|-----------------------------|-----------------|-----|

|                                               |                      |    |     |
|-----------------------------------------------|----------------------|----|-----|
| <i>Chlorospingus flavopectus</i> <sup>p</sup> | Common Chlorospingus | Oc | [7] |
|-----------------------------------------------|----------------------|----|-----|

|                             |                          |    |       |
|-----------------------------|--------------------------|----|-------|
| <i>Mionectes oleagineus</i> | Ochre-bellied Flycatcher | Oc | [5,9] |
|-----------------------------|--------------------------|----|-------|

|                                         |                          |    |     |
|-----------------------------------------|--------------------------|----|-----|
| <i>Mionectes olivaceus</i> <sup>p</sup> | Olive-striped Flycatcher | Oc | [7] |
|-----------------------------------------|--------------------------|----|-----|

**Grallariidae**

|                             |                           |    |     |
|-----------------------------|---------------------------|----|-----|
| <i>Hylopezus fulviventr</i> | Fulvous-breasted Antpitta | Oc | [8] |
|-----------------------------|---------------------------|----|-----|

|                                 |                                              |    |       |
|---------------------------------|----------------------------------------------|----|-------|
| <i>Hylopezus perspicillatus</i> | Spectacled Antpitta/ Streak-chested Antpitta | Oc | [5,8] |
|---------------------------------|----------------------------------------------|----|-------|

**Vireonidae**

|                                                             |                 |    |        |
|-------------------------------------------------------------|-----------------|----|--------|
| <i>Hylophilus decurtatus</i> / <i>Pachysylvia decurtata</i> | Lesser Greenlet | Oc | [8,22] |
|-------------------------------------------------------------|-----------------|----|--------|

|                                |                        |    |       |
|--------------------------------|------------------------|----|-------|
| <i>Hylophilus ochraceiceps</i> | Tawny-crowned Greenlet | Oc | [5,8] |
|--------------------------------|------------------------|----|-------|

|                                          |                    |    |        |
|------------------------------------------|--------------------|----|--------|
| <i>Vireo philadelphicus</i> <sup>p</sup> | Philadelphia Vireo | Oc | [7,22] |
|------------------------------------------|--------------------|----|--------|

**Accipitridae**

|                           |               |    |     |
|---------------------------|---------------|----|-----|
| <i>Buteo magnirostris</i> | Roadside Hawk | Oc | [5] |
|---------------------------|---------------|----|-----|

**Accipitridae** (continuation)

|                                |                   |    |     |
|--------------------------------|-------------------|----|-----|
| <i>Buteogallus anthracinus</i> | Common Black Hawk | Oc | [5] |
|--------------------------------|-------------------|----|-----|

**Tinamidae**

|                      |               |    |     |
|----------------------|---------------|----|-----|
| <i>Tinamus major</i> | Great Tinamou | Oc | [5] |
|----------------------|---------------|----|-----|

**Cracidae**

|                   |                |    |     |
|-------------------|----------------|----|-----|
| <i>Crux rubra</i> | Great Curassow | Oc | [5] |
|-------------------|----------------|----|-----|

**Tityridae**

|                                 |                           |    |     |
|---------------------------------|---------------------------|----|-----|
| <i>Myiobius sulphureipygius</i> | Sulphur-rumped Flycatcher | Oc | [5] |
|---------------------------------|---------------------------|----|-----|

|                             |                        |    |     |
|-----------------------------|------------------------|----|-----|
| <i>Schiffornis turdinus</i> | Thrushlike Schiffornis | Oc | [5] |
|-----------------------------|------------------------|----|-----|

**Trogonidae**

|                     |                       |    |     |
|---------------------|-----------------------|----|-----|
| <i>Trogon rufus</i> | Black-throated Trogon | Oc | [5] |
|---------------------|-----------------------|----|-----|

**Cotingidae**

|                          |              |    |     |
|--------------------------|--------------|----|-----|
| <i>Lipaugus unirufus</i> | Rufous Pitha | Oc | [5] |
|--------------------------|--------------|----|-----|

## Poliophtidae

*Ramphocaenus melanurus* Long-billed Gnatwren Oc [5]

## Rhinocryptidae

*Scytalopus argentifrons* <sup>p</sup> Silvered-fronted Tapaculo Oc [7]

---

## References

1. Willis, E.O.; Oniki, Y. Birds and Army Ants. *Annu. Rev. Ecol. Syst.* **1978**, *9*, 243–263, doi:10.1146/annurev.es.09.110178.001331.
2. Oniki, Y.; Willis, E.O. Studies of Ant-Following Birds North of the Eastern Amazon. *Acta Amaz.* **1972**, *2*, 127–151, doi:10.1590/1809-43921972022127.
3. Wrege, P.H.; Wikelski, M.; Mandel, J.T.; Rassweiler, T.; Couzin, I.D. Antbirds parasitizes foraging army ants. *Ecology* **2005**, *86*, 555–559, doi:10.1890/04-1133.
4. Batcheller, H.J. Interspecific information use by army-ant-following birds. *Auk* **2017**, *134*, 247–255, doi:10.1642/AUK-16-93.1.
5. Swartz, M.B. Behavioral and Population Ecology of the Army Ant *Eciton burchellii* and Ant-following Birds, The University of Texas at Austin, 1997.
6. Kumar, A.; O'Donnell, S. Fragmentation and elevation effects on bird-army ant interactions in neotropical montane forest of Costa Rica. *J. Trop. Ecol.* **2007**, *23*, 581–590, doi:10.1017/S0266467407004270.
7. O'Donnell, S. Evidence for facilitation among avian army-ant attendants: specialization and species associations across elevations. *Biotropica* **2017**, *49*, 665–674, doi:10.1111/btp.12452.
8. Cody, M.L. Antibird Guilds in the Lowland Caribbean Rainforest of Southeast Nicaragua. *Condor* **2000**, *102*, 784–794.
9. Swartz, M.B. Bivouac checking, a novel behavior distinguishing obligate from opportunistic species of army-ant-following birds. *Condor* **2001**, *103*, 629–633, doi:10.1650/0010-5422(2001)103[0629:BCANBD]2.0.CO;2.
10. Stouffer, P.C.; Bierregaard, R.O. Use of Amazonian forest fragments by understory insectivorous birds. *Ecology* **1995**, *76*, 2429–2445, doi:10.2307/2265818.
11. Pizo, M.A.; Melo, A.S. Attendance and co-occurrence of birds following army ants in the Atlantic rain forest. *Condor* **2010**, *112*, 571–578, doi:10.1525/cond.2010.090057.
12. Willis, E.O. Studies of the Behavior of Lunulated and Salvin ' s Antbirds. *Condor* **1968**, *70*, 128–148.
13. Brumfield, R.T.; Tello, J.G.; Cheviron, Z.A.; Carling, M.D.; Crochet, N.; Rosenberg, K. V. Phylogenetic conservatism and antiquity of a tropical specialization: Army-ant-following in the typical antbirds (Thamnophilidae). *Mol. Phylogenet. Evol.* **2007**, *45*, 1–13, doi:10.1016/j.ympev.2007.07.019.

14. Willis, E.O. Taxonomy and Behavior of Pale-Faced Antbirds. *Auk* **1968**, *85*, 253–264.
15. Oniki, Y. Studies of the guild of ant-following birds at Belém, Brazil. *Acta Amaz.* **1972**, *2*, 59–79, doi:10.1590/1809-43921972021059.
16. Chesser, R.T. Comparative Diets of Obligate Ant-Following Birds at a Site in Northern Bolivia. *Biotropica* **1995**, *27*, 382–390.
17. Lees, A.C.; Peres, C.A. Habitat and Life History Determinants of Antbird Occurrence in Variable-Sized Amazonian Forest Fragments. *Biotropica* **2010**, *42*, 614–621, doi:10.1111/j.1744-7429.2010.00625.x.
18. Willson, S. Obligate army-ant-following birds: a study of ecology, spatial movement patterns, and behavior in Amazonian Peru. *Ornithol. Monogr.* **2004**, *1*–67, doi:10.2307/40166802.
19. Willis, E.O. Interspecific Competition and the Foraging Behavior of Plain-Brown Woodcreepers. *Ecology* **1966**, *47*, 667–672.
20. Willis, E.O. The behaviour of spotted antbirds. *Ornithol. Monogr.* **1972**, *10*, 1–162.
21. Chaves-Campos, J. Localization of army-ant swarms by ant-following birds on the Caribbean slope of Costa Rica: Following the vocalization of antbirds to find the swarms. *Ornithol. Neotrop.* **2003**, *14*, 289–294.
22. O'Donnell, S.; Kumar, A.; Logan, C. Do Neartic migrant birds compete with residents at army ant raids? A geographic and seasonal analysis. *Wilson J. Ornithol.* **2014**, *126*, 474–487.
23. Bodrati, A.; Cockle, K.L.; Di Sallo, F.G. Nesting and natural history of the Plain-winged Woodcreeper (*Dendrocincla turdina*): Foraging associations and uniparental care. *Wilson J. Ornithol.* **2018**, *130*, 696–707, doi:10.1676/17-076.1.
24. Santana, A.; Silva, S.M.; Batista, R.; Sampaio, I.; Aleixo, A. Molecular systematics, species limits, and diversification of the genus *Dendrocolaptes* (Aves: Furnariidae): Insights on biotic exchanges between dry and humid forest types in the Neotropics. *J. Zool. Syst. Evol. Res.* **2021**, *59*, 277–293, doi:10.1111/jzs.12408.
25. Menger, J.; Henle, K.; Magnusson, W.E.; Soro, A.; Husemann, M.; Schlegel, M. Genetic diversity and spatial structure of the Rufous-throated Antbird (*Gymnopithys rufigula*), an Amazonian obligate army-ant follower. *Ecol. Evol.* **2017**, *7*, 2671–2684, doi:10.1002/ece3.2880.
26. Touchton, J.M.; Smith, J.N.M.; Ecology, S.; May, N.; Touchton, J.M.; Smith, J.N.M. Species loss , delayed numerical responses , and functional compensation in an antbird guild Stable. *Ecology* **2011**, *92*, 1126–1136.
27. Touchton, J.M.; Wikelski, M. Ecological opportunity leads to the emergence of an alternative behavioural phenotype in a tropical bird. *J. Anim. Ecol.* **2015**, *84*, 1041–1049, doi:10.1111/1365-2656.12341.
28. Willis, E.O. Myrmotherula Antwrens (Aves, Formicariidae) as army ant followers. *Rev. Bras. Zool.* **1983**, *2*, 153–158, doi:10.1590/s0101-81751983000300006.
29. Willis, E.O. The behavior of Ocellated Antbirds. *Smithson. Contrib. to Zool.* **1973**, *144*, 1–57.
30. Chaves-Campos, J.; DeWoody, J.A. The spatial distribution of avian relatives: Do obligate army-ant-following birds roost and feed near family members? *Mol. Ecol.* **2008**, *17*, 2963–2974, doi:10.1111/j.1365-294X.2008.03811.x.
31. Chaves-Campos, J. Ant colony tracking in the obligate army ant-following antbird *Phaenostictus mcleannani*. *J. Ornithol.* **2011**, *152*, 497–504, doi:10.1007/s10336-010-0607-8.
32. Willis, E.O. On the behavior of five species of Rhegmatorhina, ant-following antbirds of the Amazon Basin. *Wilson Bull.* **1969**, *81*, 363–395.
33. Roberts, D.L.; Cooper, R.J.; Petit, L.J. Flock Characteristics of Ant-Following Birds in Premontane Moist Forest and Coffee Agroecosystems. *Ecol. Appl.*

2000, 10, 1414–1425.

34. Driver, R.J.; DeLeon, S.; O'Donnell, S. Novel observation of a raptor, collared forest-falcon (*Micrastur semitorquatus*) depredating a fleeing snake at an army ant (*Eciton burchellii parvispinum*) raid front. *Wilson J. Ornithol.* **2018**, 130, 792–796.
